# Supplementary material for: Freeze-dried Lactobacillus plantarum 299v increases iron absorption in young females—Double isotope sequential single-blind studies in menstruating women
Source: PubMed Central journal article supplement (PMC5728536; doi:10.1371/journal.pone.0189141), 2017-12-13
Supplement: pone.0189141.s004.pdf [file pone.0189141.s004.pdf]

| ID | BMI  | Age (y) | Ferritin | S-Fe | TIBC | TSAT | TfR | Hb  | CRP | Fe absorption |                |                | Absorption adjusted to reference dose abs of 40% |                |
|----|------|---------|----------|------|------|------|-----|-----|-----|---------------|----------------|----------------|--------------------------------------------------|----------------|
|    |      |         |          |      |      |      |     |     |     | With LP299v   | Without LP299v | Reference dose | With LP299v                                      | Without LP299v |
|    |      |         |          |      |      |      |     |     |     | 59-Fe (blood) | 55-Fe (blood)  | Reference dose | With LP299v                                      | Without LP299v |
| 1  | 20,4 | 23,8    | 8        | 5    | 84   | 6%   | 5,3 | 138 | 1   | 59,1          | 34,2           | 32,7           | 72,3                                             | 41,8           |
| 2  | 29,5 | 39,6    | 11       | 9    | 78   | 11%  | 4,3 | 136 | 1   | 51,5          | 37,8           | 83,4           | 24,7                                             | 18,1           |
| 3  | 18,8 | 31,4    | 32       | 19   | 68   | 28%  | 3,5 | 139 | 1   | 13,3          | 13,4           | 53,4           | 10,0                                             | 10,0           |
| 4  | 21,5 | 27,9    | 29       | 20   | 67   | 30%  | 4,6 | 142 | 0   | 29,2          | 10,8           | 58,0           | 20,1                                             | 7,4            |
| 5  | 27,8 | 23,6    | 68       | 18   | 72   | 25%  | 2,4 | 146 | 1   | 7,3           | 6,7            | 34,5           | 8,5                                              | 7,8            |
| 6  | 21,3 | 24,5    | 80       | 13   | 70   | 19%  | 3,3 | 134 | 1   | 2,7           | 2,5            | 12,4           | 8,7                                              | 8,1            |
| 7  | 28,1 | 26,5    | 20       | 9    | 62   | 15%  | 3,1 | 135 | 1   | 40,0          | 43,0           | 67,7           | 23,6                                             | 25,4           |
| 8  | 23,5 | 24,9    | 23       | 19   | 59   | 33%  | 3,4 | 126 | 1   | 10,7          | 10,7           | 37,9           | 11,3                                             | 11,3           |
| 9  | 25,0 | 26,6    | 20       | 19   | 66   | 29%  | 3,2 | 135 | 1   | 30,3          | 41,5           | 33,4           | 36,3                                             | 49,7           |
| 10 | 21,8 | 21,4    | 23       | 10   | 67   | 15%  | 2,4 | 123 | 1   | 9,1           | 6,6            | 20,5           | 17,8                                             | 12,9           |
| 11 | 18,5 | 24,2    | 35       | 19   | 85   | 22%  | 3,1 | 137 | 1   | 24,3          | 21,0           | 36,1           | 26,9                                             | 23,3           |
| 12 | 16,4 | 23,2    | 8,5      | 14   | 93   | 15%  | 4,4 | 131 | 1   | 34,7          | 11,2           | 39,2           | 35,4                                             | 11,4           |
| 13 | 24,3 | 23,6    | 32       | 19   | 69   | 27%  | 2,6 | 129 | 1   | 8,6           | 9,7            | 36,0           | 9,6                                              | 10,8           |
| 14 | 23,2 | 24,9    | 26       | 10   | 87   | 11%  | 2,3 | 138 | 1   | 8,5           | 5,5            | 38,1           | 8,9                                              | 5,8            |

|               |             |             |           |           |           |            |            |            |          |             |             |             |             |             |
|---------------|-------------|-------------|-----------|-----------|-----------|------------|------------|------------|----------|-------------|-------------|-------------|-------------|-------------|
| <b>Mean</b>   | <b>22,9</b> | <b>26,2</b> | <b>30</b> | <b>15</b> | <b>73</b> | <b>20%</b> | <b>3,4</b> | <b>135</b> | <b>1</b> | <b>23,5</b> | <b>18,2</b> | <b>41,7</b> | <b>22,4</b> | <b>17,4</b> |
| <b>SD</b>     | <b>3,8</b>  | <b>4,6</b>  | <b>21</b> | <b>5</b>  | <b>10</b> | <b>8%</b>  | <b>0,9</b> | <b>6</b>   | <b>0</b> | <b>17,9</b> | <b>14,5</b> | <b>18,4</b> | <b>17,3</b> | <b>13,4</b> |
| <b>Median</b> | <b>22,5</b> | <b>24,7</b> | <b>25</b> | <b>16</b> | <b>70</b> | <b>21%</b> | <b>3,3</b> | <b>136</b> | <b>1</b> | <b>18,8</b> | <b>11,0</b> | <b>37,0</b> | <b>18,9</b> | <b>11,4</b> |
