# Supplementary material for: Freeze-dried Lactobacillus plantarum 299v increases iron absorption in young females—Double isotope sequential single-blind studies in menstruating women
Source: PLoS One. 2017 Dec 13;12(12):e0189141. doi: 10.1371/journal.pone.0189141 (PMC5728536; doi:10.1371/journal.pone.0189141)
Supplement: S2 Data — (PDF) [file pone.0189141.s005.pdf]

|    |      |         |          |      |      |      |     |     |     | Fe absorption    |                   |                   | Absorption adjusted<br>to reference dose abs<br>of 40% |                   |
|----|------|---------|----------|------|------|------|-----|-----|-----|------------------|-------------------|-------------------|--------------------------------------------------------|-------------------|
|    |      |         |          |      |      |      |     |     |     | With<br>LP299v   | Without<br>LP299v |                   |                                                        |                   |
| ID | BMI  | Age (y) | Ferritin | S-Fe | TIBC | TSAT | TfR | Hb  | CRP | 59-Fe<br>(blood) | 55-Fe<br>(blood)  | Reference<br>dose | With<br>LP299v                                         | Without<br>LP299v |
| 1  | 25,9 | 22,7    | 21       | 12   | 76   | 15%  | 3,4 | 123 | 1   | 68,7             | 36,5              | 74,8              | 36,7                                                   | 19,5              |
| 2  | 19,6 | 23,6    | 13       | 15   | 77   | 19%  | 3,2 | 144 | 1   | 32,8             | 33,9              | 68,7              | 19,1                                                   | 19,7              |
| 3  | 26,2 | 23,5    | 15       | 15   | 77   | 19%  | 3,4 | 132 | 1   | 33,8             | 39,9              | 49,3              | 27,4                                                   | 32,4              |
| 4  | 21,9 | 21,8    | 12       | 16   | 90   | 18%  | 3,8 | 118 | 1   | 15,1             | 24,5              | 22,4              | 27,0                                                   | 43,8              |
| 5  | 23,8 | 24,3    | 15       | 12   | 79   | 15%  | 3,5 | 134 | 2   | 37,8             | 37,9              | 63,4              | 23,8                                                   | 23,9              |
| 6  | 23,6 | 23,9    | 21       | 33   | 100  | 33%  | 3,6 | 135 | 4   | 48,4             | 29,2              | 53,7              | 36,1                                                   | 21,8              |
| 7  | 27,1 | 22,2    | 30       | 12   | 76   | 15%  | 3,3 | 145 | 3   | 43,5             | 49,8              | 36,3              | 47,9                                                   | 54,9              |
| 8  | 22,8 | 32,2    | 24       | 19   | 80   | 23%  | 2,2 | 136 | 2   | 15,5             | 18,4              | 14,9              | 41,6                                                   | 49,4              |
| 9  | 25,8 | 21,8    | 12       | 7    | 82   | 8%   | 3,2 | 130 | 1   | 60,4             | 29,5              | 77,5              | 31,2                                                   | 15,2              |
| 10 | 21,0 | 22,7    | 34       | 23   | 82   | 28%  | 2,5 | 131 | 1   | 14,9             | 13,2              | 31,2              | 19,1                                                   | 16,9              |
| 11 | 22,4 | 22,3    | 26       | 21   | 71   | 30%  | 5,0 | 131 | 1   | 54,5             | 37,6              | 46,5              | 46,9                                                   | 32,3              |
| 12 | 19,4 | 25,8    | 18       | 11   | 87   | 13%  | 4,0 | 142 | 3   | 18,5             | 21,6              | 27,2              | 27,2                                                   | 31,8              |
| 13 | 22,2 | 24,9    | 31       | 24   | 65   | 37%  | 2   | 130 | 1   | 6,8              | 4,6               | 48,8              | 5,6                                                    | 3,8               |
| 14 | 20,1 | 22,4    | 38       | 13   | 75   | 18%  | 3,9 | 150 | 1   | 12,5             | 5,9               | 40,0              | 12,5                                                   | 5,9               |
| 15 | 23,2 | 25,1    | 15       | 9    | 64   | 13%  | 2,9 | 133 | 1   | 30,4             | 12,0              | 60,5              | 20,1                                                   | 7,9               |
| 16 | 20,5 | 51,2    | 54       | 16   | 57   | 29%  | 2,6 | 132 | 1   | 6,1              | 4,6               | 29,5              | 8,3                                                    | 6,2               |
| 17 | 21,6 | 31,7    | 44       | 13   | 52   | 25%  | 2,0 | 135 | 1   | 18,8             | 17,6              | 49,5              | 15,2                                                   | 14,2              |
| 18 | 28,2 | 23,2    | 10       | 5    | 100  | 5%   | 5,4 | 131 | 1   | 44,0             | 35,2              | 53,3              | 33,0                                                   | 26,4              |

|    |      |      |    |    |    |     |     |     |   |      |      |      |      |      |
|----|------|------|----|----|----|-----|-----|-----|---|------|------|------|------|------|
| 19 | 25,5 | 29,2 | 19 | 14 | 86 | 17% | 3,3 | 134 | 1 | 59,9 | 32,9 | 63,8 | 37,6 | 20,6 |
| 20 | 22,7 | 29,3 | 32 | 37 | 72 | 51% | 2,6 | 142 | 1 | 13,5 | 9,5  | 35,7 | 15,1 | 10,6 |
| 21 | 23,9 | 27,6 | 34 | 16 | 64 | 25% | 4,6 | 156 | 1 | 23,3 | 35,3 | 57,4 | 16,2 | 24,6 |
| 22 | 21,8 | 39,5 | 14 | 20 | 67 | 30% | 2,3 | 124 | 1 | 45,0 | 38,9 | 59,2 | 30,4 | 26,3 |
| 23 | 17,9 | 19,2 | 19 | 23 | 77 | 30% | 2,4 | 115 | 3 | 12,3 | 7,1  | 46,4 | 10,6 | 6,1  |
| 24 | 19,8 | 20,9 | 53 | 12 | 55 | 21% | 3,6 | 133 | 3 | 4,7  | 5,0  | 34,2 | 5,5  | 5,8  |
| 25 | 22,5 | 30,0 | 44 | 15 | 55 | 28% | 2,4 | 142 | 1 | 16,0 | 14,0 | 35,4 | 18,1 | 15,8 |
| 26 | 20,9 | 19,6 | 51 | 16 | 68 | 23% | 2,3 | 138 | 1 | 8,7  | 7,9  | 28,5 | 12,2 | 11,1 |
| 27 | 25,0 | 18,8 | 42 | 14 | 68 | 21% | 2,8 | 132 | 1 | 30,5 | 18,4 | 37,5 | 32,5 | 19,6 |
| 28 | 22,4 | 18,8 | 6  | 10 | 81 | 12% | 4,5 | 113 | 1 | 57,9 | 36,2 | 76,3 | 30,4 | 19,0 |

|        |      |      |    |    |    |     |     |     |   |      |      |      |      |      |
|--------|------|------|----|----|----|-----|-----|-----|---|------|------|------|------|------|
| Mean   | 22,8 | 25,6 | 27 | 16 | 74 | 22% | 3,2 | 134 | 1 | 29,8 | 23,5 | 47,2 | 24,5 | 20,9 |
| SD     | 2,5  | 6,8  | 14 | 7  | 12 | 10% | 0,9 | 10  | 1 | 19,2 | 13,6 | 16,9 | 12,0 | 13,1 |
| Median | 22,5 | 23,6 | 23 | 15 | 76 | 21% | 3,3 | 133 | 1 | 26,9 | 23,1 | 47,7 | 25,4 | 19,6 |
